# Supplementary material for: Sensitive electrochemical sensor based on poly(l-glutamic acid)/graphene oxide composite material for simultaneous detection of heavy metal ions
Source: Royal Society of Chemistry journal article supplement (doi:10.1039/c9ra01891c), 2019-01-01
Supplement: c9ra01891c1.pdf [file c9ra01891c1.pdf]

## Supporting Material

### Sensitive Electrochemical Sensor Based on Poly(L-glutamic acid)/Graphene Oxide Composite Material for Simultaneous Detection of Heavy Metal Ions

Wei Yi, <sup>[a]</sup>Zihua He, <sup>[a]</sup>JunjieFei, <sup>[b]</sup>Xiaohua He\* <sup>[a]</sup>

[a] School of Chemistry and Molecular Engineering, East China Normal University, 500 Dongchuan Road, Shanghai 200241, China

Email: xhhe@chem.ecnu.edu.cn

[b] Key Laboratory of Environmentally Friendly Chemistry and Applications of Ministry of Education, College of Chemistry, Xiangtan University, Xiangtan 411105, China

## Experimental Section

### Reagents and Materials

(4-aminophenyl)-10,15,20-tris(phenyl)porphyrin(99.0%) and  $\gamma$ -Benzyl-L-glutamate (99.0%) was purchased from Sigma-Aldrich. Trifluoroacetic acid (TFA, A.R. grade), N,N-dimethylformamide (DMF, A.R. grade), and other solvents were purchased from Shanghai Chemical Reagent and purified by conventional procedures if needed.  $\gamma$ -Benzyl-L-glutamate N-carboxyanhydride (BLG-NCA) was synthesized according to the literature[1].

### Synthesis of Polypeptide

The synthetic route of poly (L-glutamic acid) (PGA) is as follows:

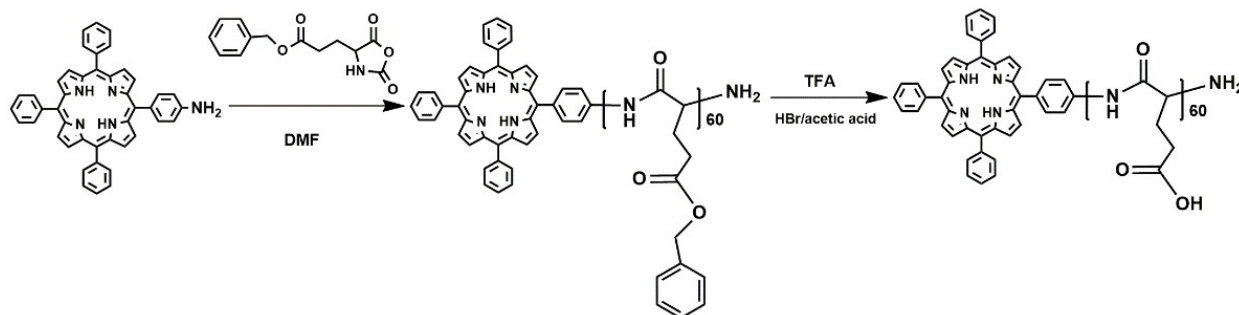

#### 1. Synthesis of Poly ( $\gamma$ -benzyl-glutamate)

Poly ( $\gamma$ -benzyl-glutamate) (PBLG) with a terminal porphyrin group was synthesized by using 5-(4-aminophenyl)-10,15,20-tris(phenyl)porphyrin as an initiator and the

synthetic procedure was adapted from the literature[2]. In a typical experiment, BLG-NCA (3.50g, 13.5mmol), 5-(4-aminophenyl)-10,15,20-tris(phenyl)porphyrin (0.17g, 0.27mmol) and anhydrous DMF (40 mL) were added into a dried round-bottom flask with a magnetic bar in a glove box, and then the solution was stirred under pure nitrogen at room temperature for 5 days. After polymerization, the solution was concentrated and then precipitated into an excess amount of methanol, filtered, and dried at room temperature in a vacuum oven overnight.

Yield: 87.2%,  $M_n$  (GPC) =  $2.25 \times 10^4$ ,  $M_w/M_n$  = 1.26.  $^1\text{H}$  NMR (500 MHz,  $\text{CDCl}_3 + 15\% \text{TFA}$ ),  $\delta$  (ppm): 8.80~8.00 (m, porphyrin), 7.88 (br,  $\text{NHCO}$ ), 7.31 (br,  $\text{C}_6\text{H}_5\text{CH}_2-$ ), 5.07 (br,  $\text{C}_6\text{H}_5\text{CH}_2-$ ), 4.61 (br,  $-\text{OCC}^{\text{H}}\text{NH}-$ ), 2.50~2.42 (m,  $-\text{OOC}^{\text{H}}\text{CH}_2\text{CH}_2-$ ), 2.13~1.91 (m,  $-\text{OOC}^{\text{H}}\text{CH}_2\text{CH}_2-$ ). (See Fig. 1S and Fig. 2S)

## 2. Synthesis of poly (L-glutamic acid)

Poly (L-glutamic acid) (PGA) was synthesized according to a published procedure[3]. In a typical experiment, the above prepared PBLG (1.0g) was dissolved in TFA (1.2 mL) and 33 wt% HBr/acetic acid (4.5 mL), and then stirred for 2 h at room temperature. The polymer was precipitated by using excess anhydrous diethyl ether, filtered, purified three times from acetic acid to anhydrous diethyl ether, and dried at 40°C under vacuum for 48 hours.  $^1\text{H}$  NMR (500 MHz,  $\text{DMSO-d}_6$ ),  $\delta$  (ppm): 12.10 (br,  $-\text{COOH}$ ), 7.95 (s,  $-\text{CHNHCO}-$ ), 2.89-2.73 (m,  $-\text{CH}_2\text{CH}_2\text{COOH}$ ), 2.09 (s, 1H,  $-\text{CHNHCO}-$ ).

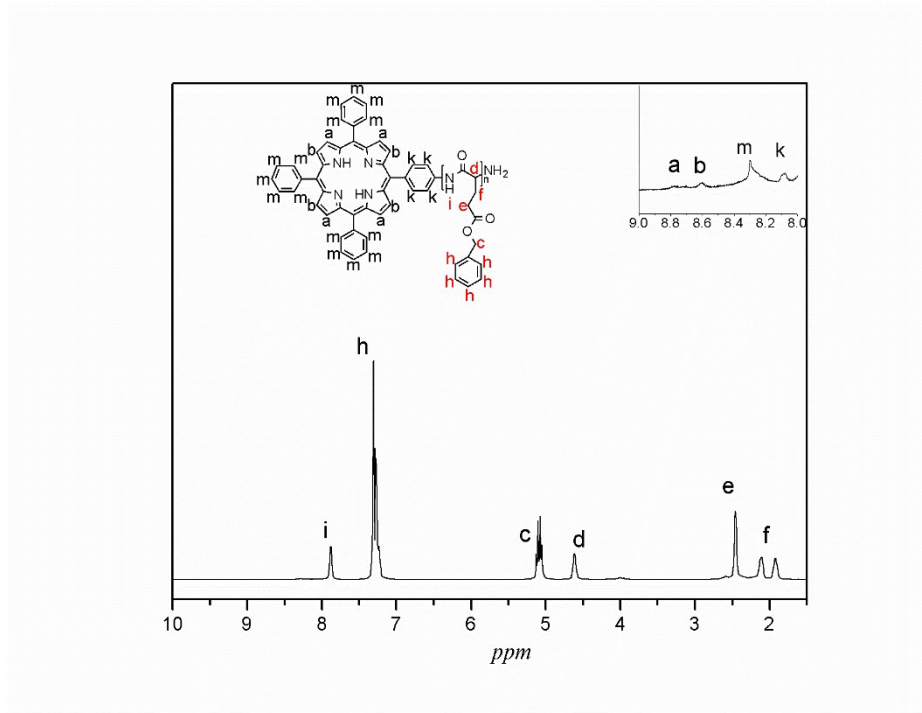

**Fig.S1.** <sup>1</sup>H NMR spectrum of poly (γ-benzyl-glutamate).

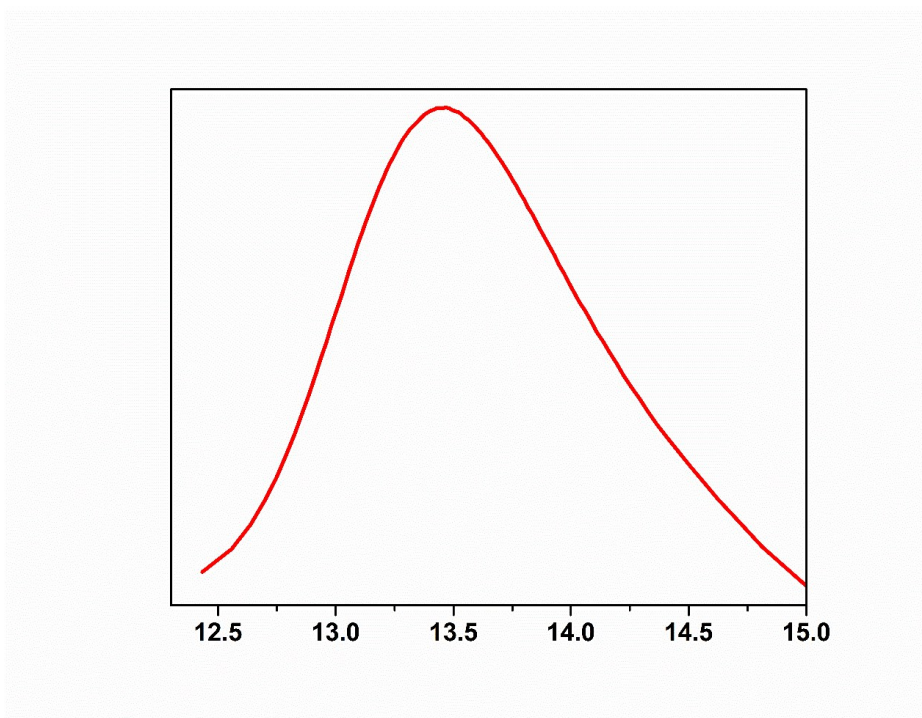

**Fig.S2.** GPC of poly (γ-benzyl-glutamate).

## Reference

- [1] E.R. Blout, R.H. Karlson, *J. Am. Chem. Soc.*, **1956**, 78, 941-946.
- [2] X. He, C. Gao, W. Sun, W. Huang, S. Lin, D. Yan, *J. Polym. Sci. Part A: Polym. Chem.*, **2013**, 51, 1040-1050.
- [3] J. Babin, D. Taton, M. Brinkmann, S. Lecommandoux, *Macromolecules*, **2008**, 41, 1384-1392.
